# Supplementary material for: Binding of Herpes Simplex Virus Type-1 Virions Leads to the Induction of Intracellular Signalling in the Absence of Virus Entry
Source: PLOS journal article supplement (doi:10.1371/journal.pone.0009560), 2010-03-04

### Figure S1. Characteristics of virions treated with PNGase

a) PNGase treatment of wild-type HSV-1 virions has no notable effect on infectivity when compared to untreated preparations. All samples had titres of the order of  $10^9$  pfu / ml on HFF cells. Titres include the standard error from duplicate assays. b)  $\Delta$ gH-negative virions were incubated with PNGase for 18 hours at 37°C. The loss of N-linked sugars on envelope glycoproteins resulted in an electrophoretic mobility shift of gD (Lane 2) when compared to untreated virus particles (Lane 1). There was no change in VP16 mobility.

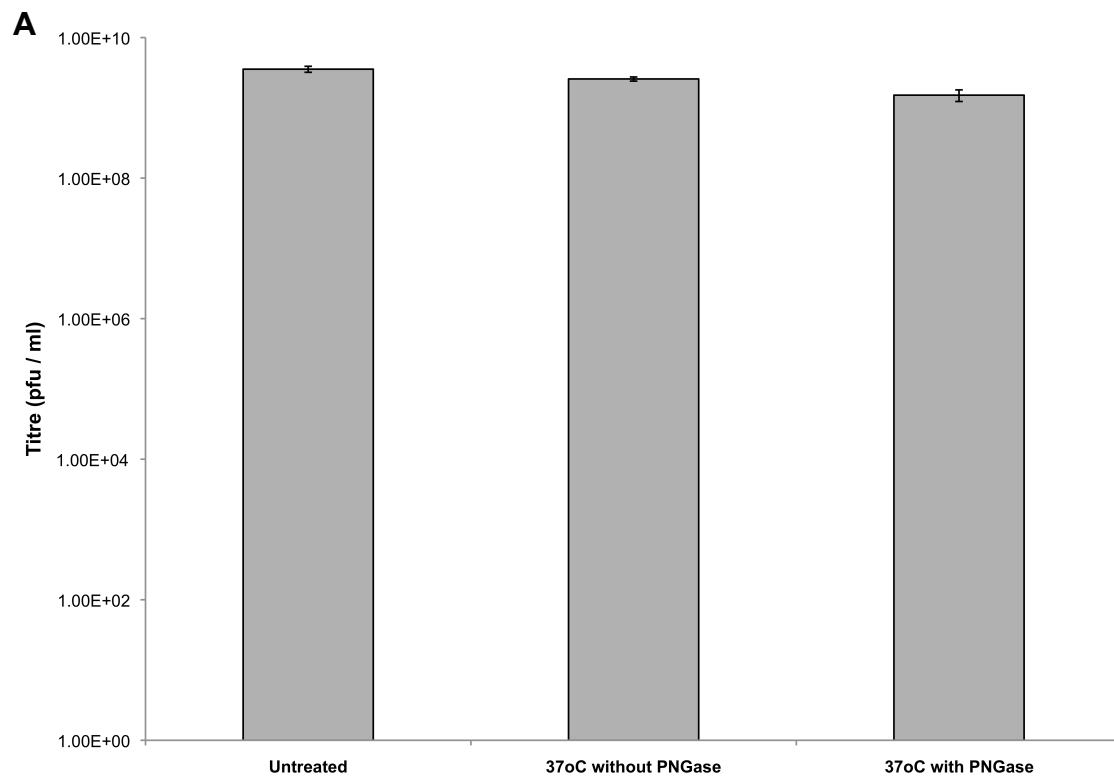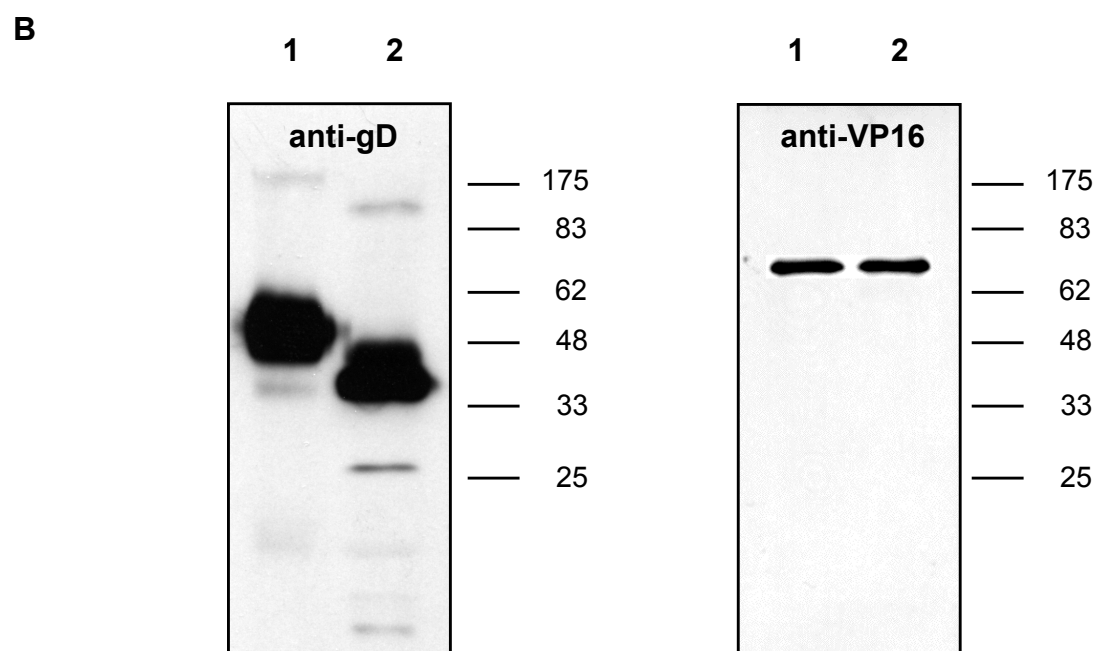

Supplement: S3 (10.1371/journal.pone.0009560.s003) [file journal.pone.0009560.s003]
